# Supplementary material for: CuO/Cu2O composite hollow polyhedrons fabricated from metal–organic framework templates for lithium-ion battery anodes with a long cycling life
Source: Royal Society of Chemistry journal article supplement (doi:10.1039/c3nr00623a), 2013-01-01
Supplement: c3nr00623a.pdf [file c3nr00623a.pdf]

## Supporting Information

### Experimental

#### Synthesis and characterization

All chemicals used in this work were analytical reagent grade and commercially available, and used without further purification.  $[\text{Cu}_3(\text{btc})_2]_n$  polyhedron have been fabricated by the microwave irradiation previously. In our case, we obtained the  $[\text{Cu}_3(\text{btc})_2]_n$  polyhedron by a solvothermal method. In a typical synthesis, 41 mg  $\text{Cu}(\text{NO}_3)_2 \cdot 3\text{H}_2\text{O}$ , 1.902 g lauric acid and 20 mg Benzene-1,3,5-tricarboxylic acid were dissolved in 10 mL of butanol. After being stirred vigorously for 10 min, the mixture was put into a 50 ml Teflon-lined stainless steel autoclave. The autoclave was treated at 140 °C and maintained for 3 h before cooled in air. The precipitates were isolated by centrifugation, washed with distilled water and absolute ethanol for several times to remove the possible residues, vacuum-dried, and kept for further characterization. The  $\text{CuO}/\text{Cu}_2\text{O}$  hollow polyhedrons were obtained by thermal decomposition of  $[\text{Cu}_3(\text{btc})_2]_n$  in air at 350 °C after 1 h.

The obtained products were characterized on an X-Ray powder diffractometer with  $\text{Cu K}\alpha$  radiation ( $\lambda = 1.5406 \text{ \AA}$ ) (Shimadzu Corporation, Japan). The morphology was examined with a JSM-6700F scanning electron microscope (SEM). The transmission electron microscope (TEM) image was obtained from a TEM (Hitachi model H-800) at an accelerating voltage of 200 kV, and high-resolution transmission electron microscope (HRTEM, JEOL-2011) was operated at an acceleration voltage of 200 kV. Thermogravimetric analysis (TGA) was carried out using a Shimadzu-50 thermoanalyser under air flow at  $10 \text{ }^\circ\text{C min}^{-1}$  in the temperature range 30-800 °C. Specific surface areas were computed from the results of  $\text{N}_2$  physisorption at 77 K (Micromeritics ASAP 2020) by using the BET (Brunauer–Emmet–Teller) and BJH (Barrett–Joyner–Halenda). The FT-IR spectrum was obtained using a Magna-IR 750 spectrometer in the range of  $500\text{-}4000 \text{ cm}^{-1}$  with a resolution of  $4 \text{ cm}^{-1}$ . After 250<sup>th</sup> cycle, the impedance spectrum of the cell was measured on an electrochemical workstation (CHI 604 B) in the frequency range of 0.001-100 kHz.

### Battery fabrication and measurement

The electrochemical behavior of the CuO/Cu<sub>2</sub>O hollow polyhedrons was examined using CR2032 coin type cells vs. Li with 1M LiPF<sub>6</sub> in ethylene carbonate and diethyl carbonate (EC:DEC = 1:1, v/v) as the electrolyte. The working electrode was fabricated by compressing a mixture of the active materials, conductive material (acetylene black, ATB), and binder (polyvinylidene fluoride (PVDF)) in a weight ratio of CuO/Cu<sub>2</sub>O hollow polyhedrons /carbon/PVDF= 50:30:20 onto a copper foil current collector. The cells were assembled in an argon-filled glove box (MBraun Labmaster 130). The electrode capacity was measured by a galvanostatic discharge-charge method at a current density of 100 mA g<sup>-1</sup>.

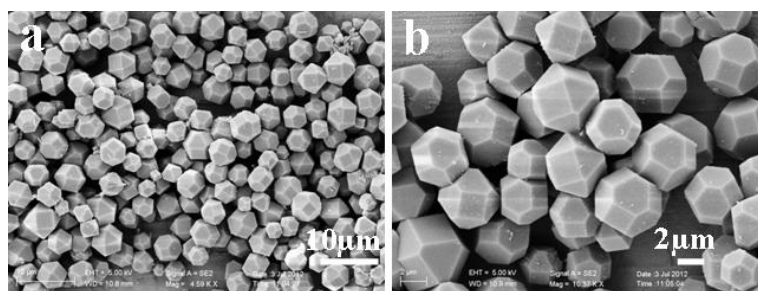

Figure S1 SEM images of [Cu<sub>3</sub>(btc)<sub>2</sub>]<sub>n</sub> at different magnifications.

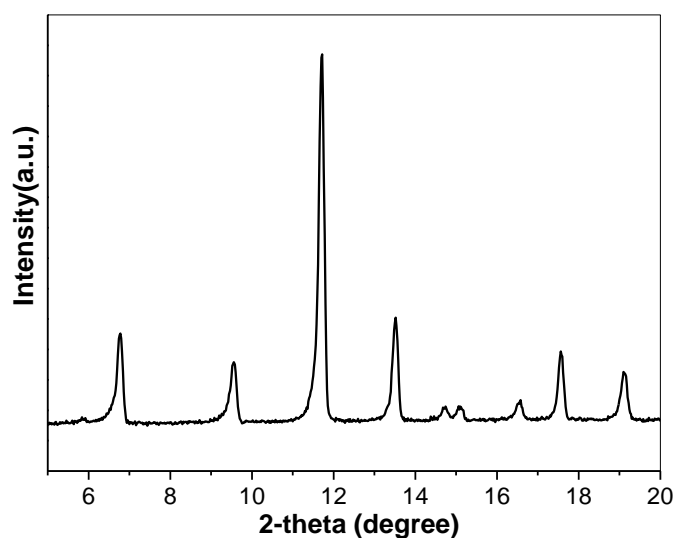

Figure S2 XRD pattern of [Cu<sub>3</sub>(btc)<sub>2</sub>]<sub>n</sub> polyhedrons.

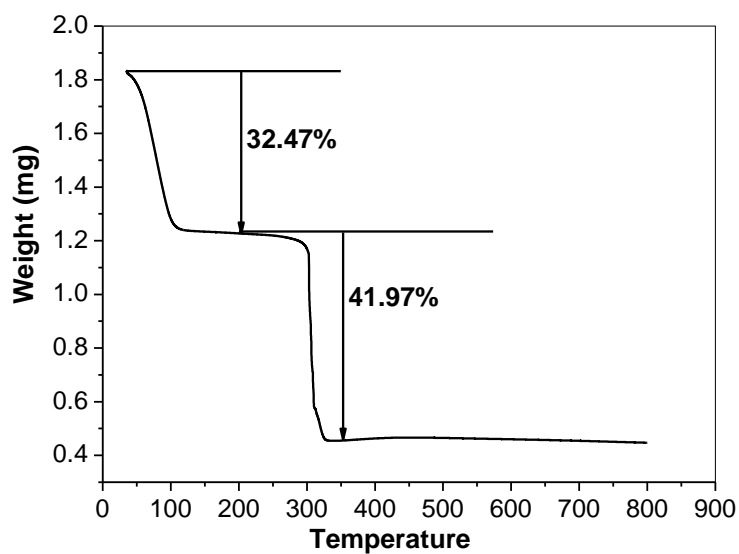

Figure S3 TG curve of  $[\text{Cu}_3(\text{btc})_2]_n$  polyhedrons in air.

| [anniemin-1.raw] 1                                                                              |         |        |     |        |       |       |         |       |  | Peak Search Report |  |
|-------------------------------------------------------------------------------------------------|---------|--------|-----|--------|-------|-------|---------|-------|--|--------------------|--|
| SCAN: 20.0/80.0/0.02/15(sec), Cu(40kV,200mA), I(max)=1270, 05/24/12 00:00                       |         |        |     |        |       |       |         |       |  |                    |  |
| PEAK: 29-pts/Parabolic Filter, Threshold=3.0, Cutoff=0.1%, BG=3/1.0, Peak-Top=Summit            |         |        |     |        |       |       |         |       |  |                    |  |
| NOTE: Intensity = Counts, 2T(0)=0.0(*), Wavelength to Compute d-Spacing = 1.54056A(Cu/K-alpha1) |         |        |     |        |       |       |         |       |  |                    |  |
| #                                                                                               | 2-Theta | d(A)   | BG  | Height | I%    | Area  | I% FWHM |       |  |                    |  |
| 1                                                                                               | 32.200  | 2.7776 | 449 | 76     | 11.5  | 3092  | 15.3    | 0.692 |  |                    |  |
| 2                                                                                               | 32.519  | 2.7511 | 451 | 93     | 14.1  | 3005  | 14.9    | 0.549 |  |                    |  |
| 3                                                                                               | 35.540  | 2.5239 | 610 | 660    | 100.0 | 14803 | 73.4    | 0.381 |  |                    |  |
| 4                                                                                               | 36.461  | 2.4622 | 615 | 620    | 93.9  | 9855  | 48.9    | 0.270 |  |                    |  |
| 5                                                                                               | 38.740  | 2.3225 | 493 | 590    | 89.4  | 20155 | 100.0   | 0.581 |  |                    |  |
| 6                                                                                               | 42.339  | 2.1330 | 432 | 174    | 26.4  | 3667  | 18.2    | 0.358 |  |                    |  |
| 7                                                                                               | 48.976  | 1.8583 | 403 | 131    | 19.8  | 4405  | 21.9    | 0.572 |  |                    |  |
| 8                                                                                               | 49.290  | 1.8472 | 419 | 71     | 10.8  | 2581  | 12.8    | 0.618 |  |                    |  |
| 9                                                                                               | 58.281  | 1.5818 | 380 | 75     | 11.4  | 1311  | 6.5     | 0.297 |  |                    |  |
| 10                                                                                              | 61.460  | 1.5074 | 372 | 172    | 26.1  | 5520  | 27.4    | 0.546 |  |                    |  |
| 11                                                                                              | 68.093  | 1.3758 | 368 | 68     | 10.3  | 1910  | 9.5     | 0.477 |  |                    |  |
| 12                                                                                              | 73.652  | 1.2851 | 358 | 70     | 10.6  | 1167  | 5.8     | 0.283 |  |                    |  |
| 13                                                                                              | 75.113  | 1.2637 | 343 | 73     | 11.1  | 1275  | 6.3     | 0.297 |  |                    |  |

Figure S4 XRD date of CuO/Cu<sub>2</sub>O composite.

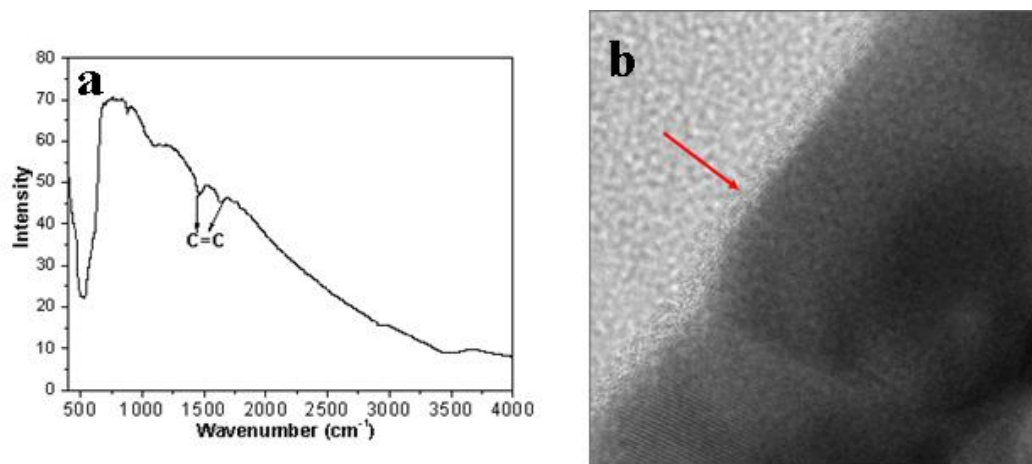

Figure S5 The infrared spectrum (IR) and TEM of CuO/Cu<sub>2</sub>O composite.

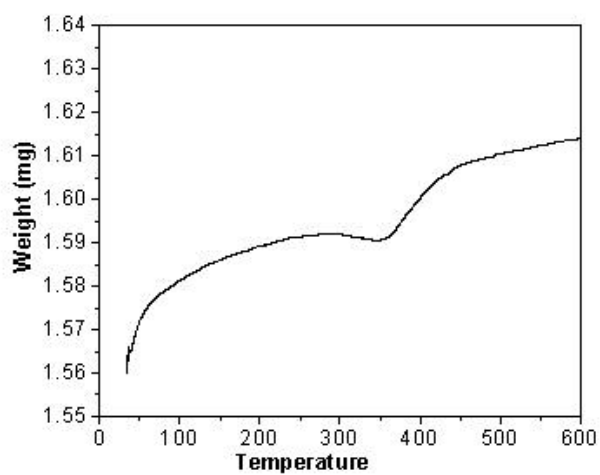

Figure S6 TG curve of CuO/Cu<sub>2</sub>O composite in air.

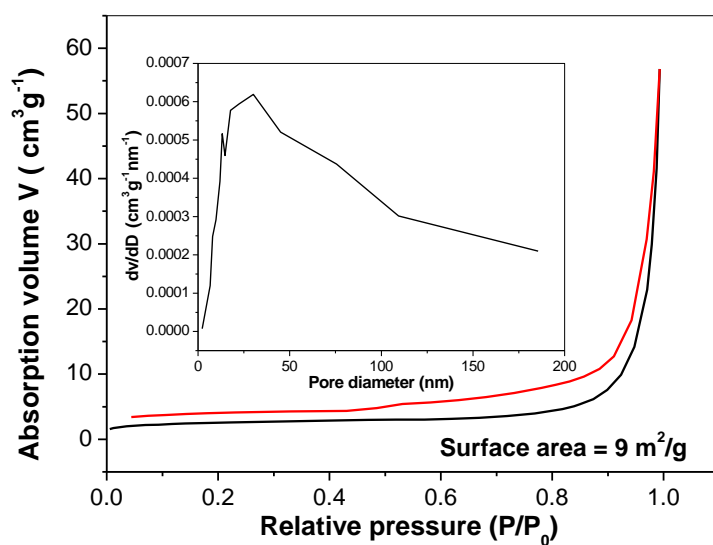

Figure S7 N<sub>2</sub> adsorption/desorption isotherm (77 K) curve of CuO/Cu<sub>2</sub>O hollow

polyhedrons and porous volume distribution of the pore size (the inset).

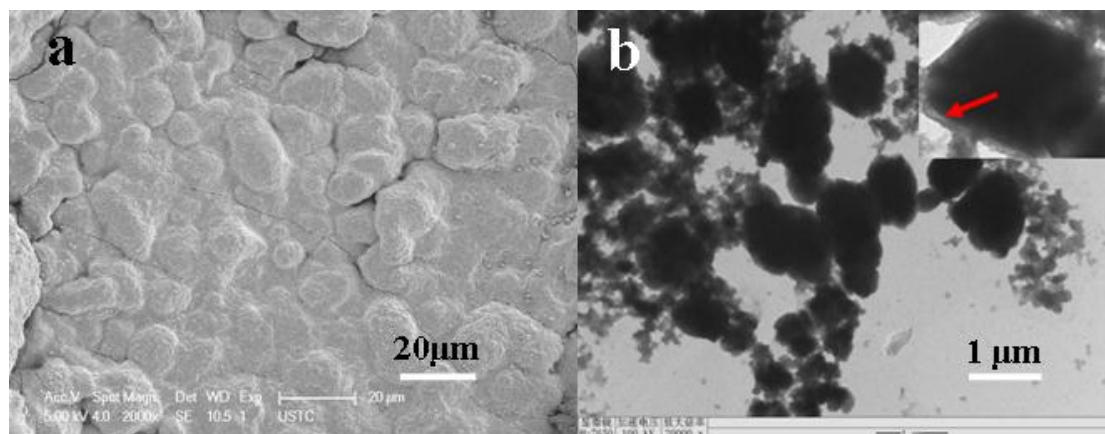

Figure S8 The SEM and TEM images of the electrode after 250 th cycles.
